# Supplementary material for: Ionic liquids as recyclable and separable reaction media in Rh-catalyzed decarbonylation of aromatic and aliphatic aldehydes
Source: Royal Society of Chemistry journal article supplement (doi:10.1039/c4ra07103d), 2014-01-01
Supplement: c4ra07103d1.pdf [file c4ra07103d1.pdf]

# Ionic liquids as recyclable and separable reaction media in Rh-catalyzed decarbonylation of aromatic and aliphatic aldehydes

Phillip Malcho, Eduardo J. García-Suárez, and Anders Riisager\*

Centre for Catalysis and Sustainable Chemistry, Department of Chemistry, Technical University of Denmark, DK-2800 Kgs. Lyngby,  
Denmark

\*Corresponding author: E-mail address: [ar@kemi.dtu.dk](mailto:ar@kemi.dtu.dk) (A. Riisager); Fax: (+45) 45883136

\*Corresponding author: Tel: +45 45252233; Fax: +45 45883136; E-mail: [ar@kemi.dtu.dk](mailto:ar@kemi.dtu.dk)

## Supporting Information

### Table of contents

**S1** TGA profiles a) [EMIm]Cl, b) [BMIm]Cl, c) [OMIm]Cl, d) [EMIm]OAc, e) [BMIm]OAc and f) [Rh(dppp)<sub>2</sub>]Cl

**S2** <sup>1</sup>H NMR spectra a) pure ionic liquid; b) extracted ether-phase after reaction; c) ionic liquid phase after reaction

**S3** Comparison of <sup>1</sup>H NMR spectra of the pure ionic liquid and extracted ether-phase after reaction

**S4** Comparison of <sup>1</sup>H NMR spectra of pure ionic liquid and extracted ionic liquid phase after reaction

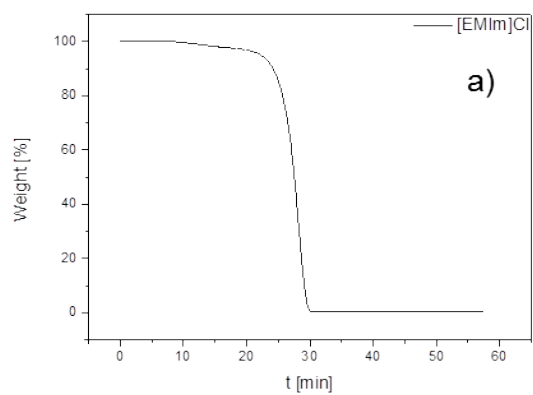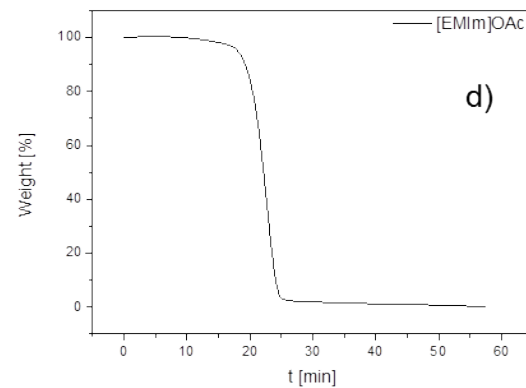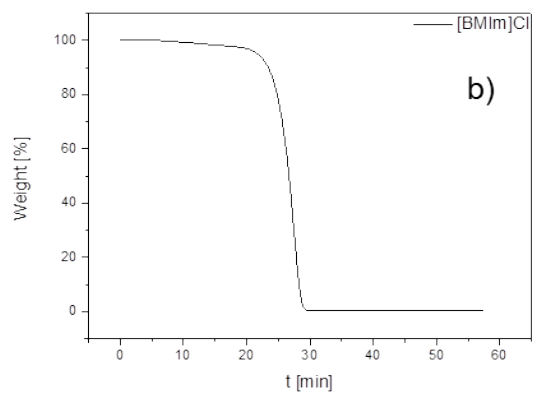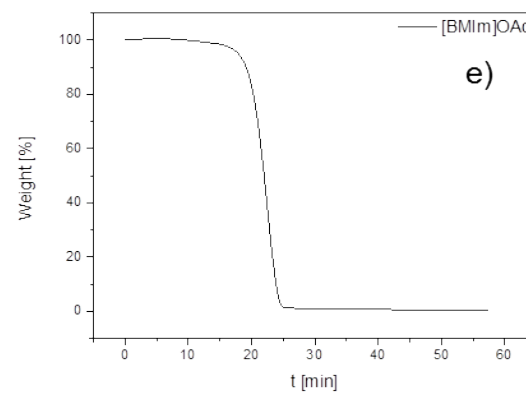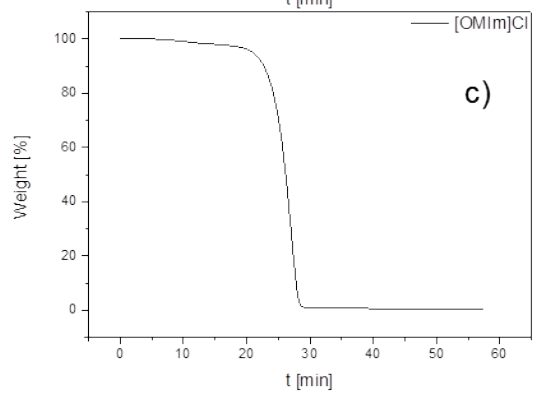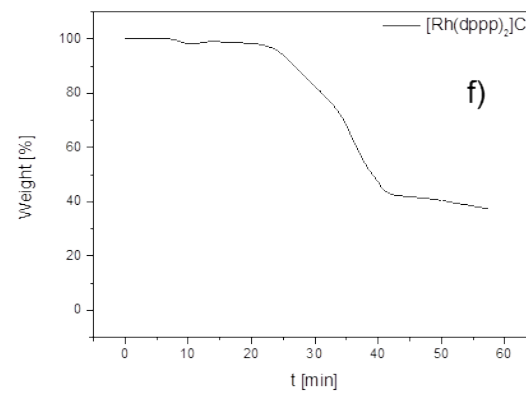

**S1.** TGA profiles for a) [EMIm]Cl, b) [BMIm]Cl, c) [OMIm]Cl, d) [EMIm]OAc, e) [BMIm]OAc and f) [Rh(dppp)<sub>2</sub>]Cl. Heating rate of 10 °C/min from room temperature to 600 °C.

a)

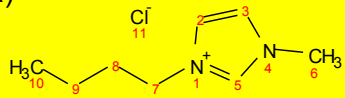

Pure Ionic liquid

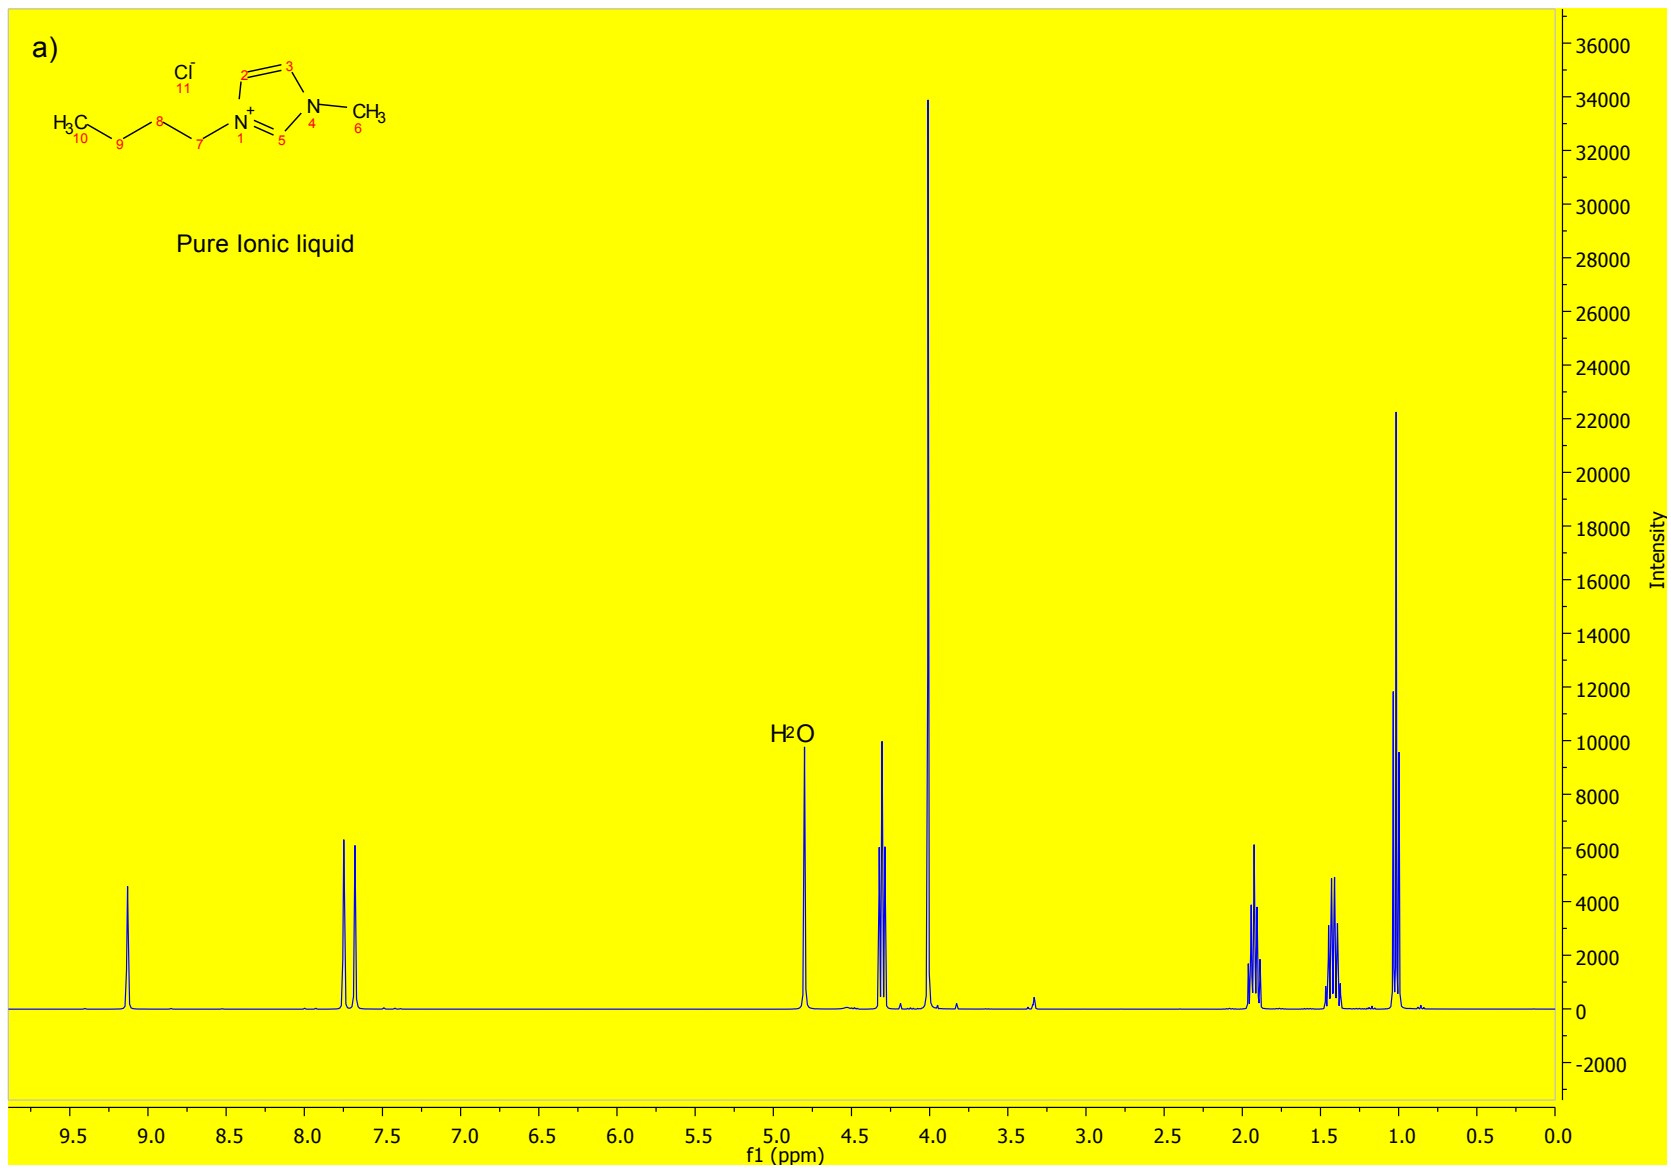

b)

ether-phase after reaction

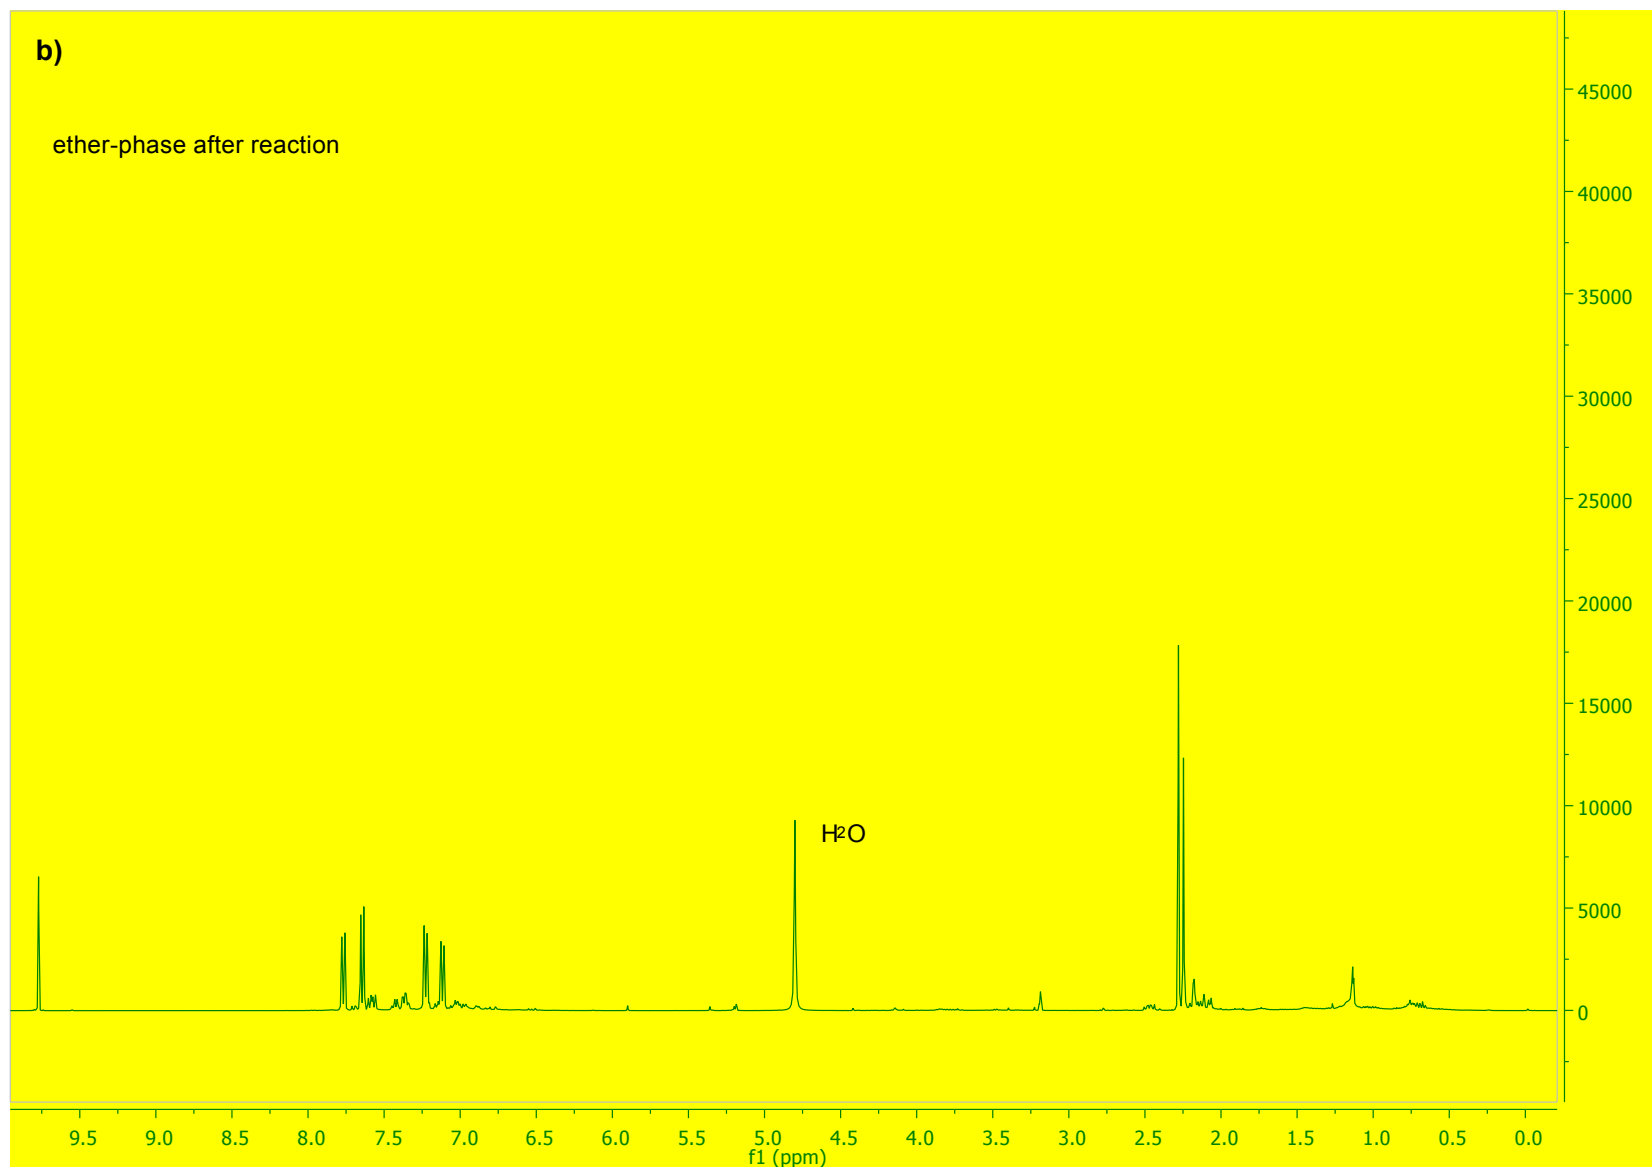

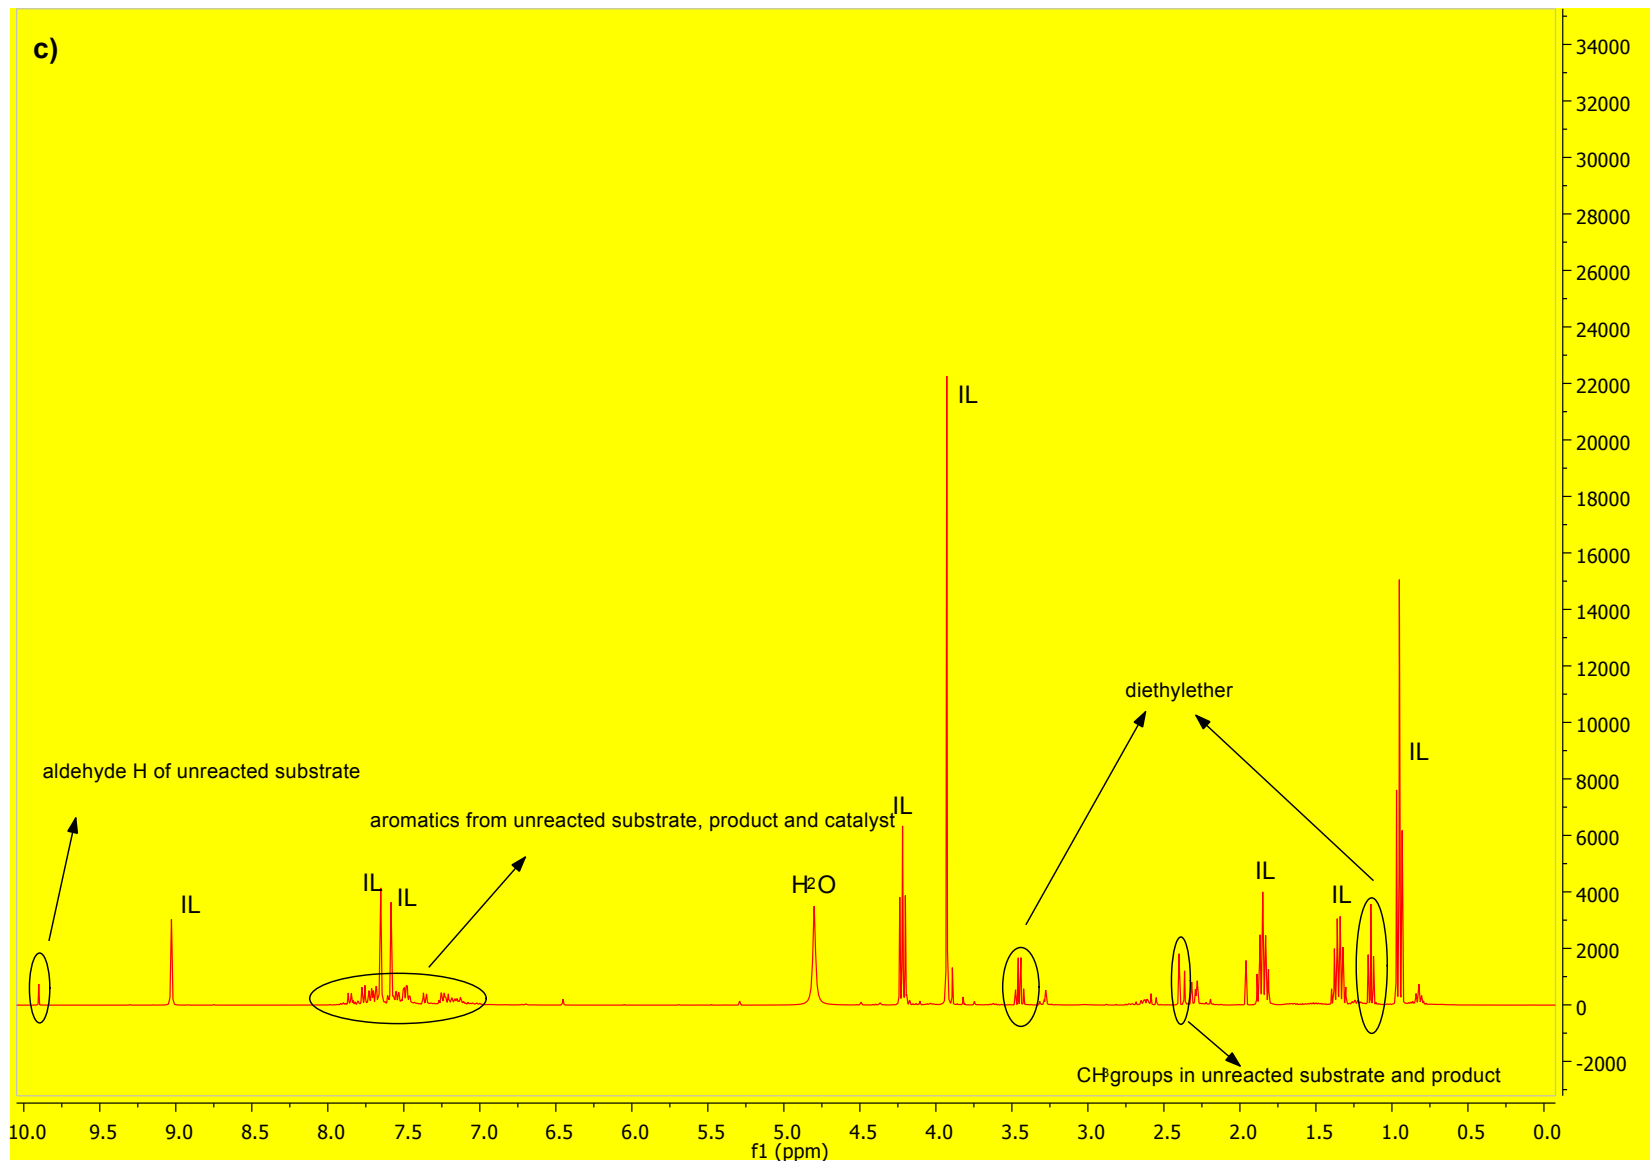

**S2** <sup>1</sup>H NMR spectra a) pure ionic liquid; b) extracted ether-phase after reaction; c) ionic liquid phase after reaction

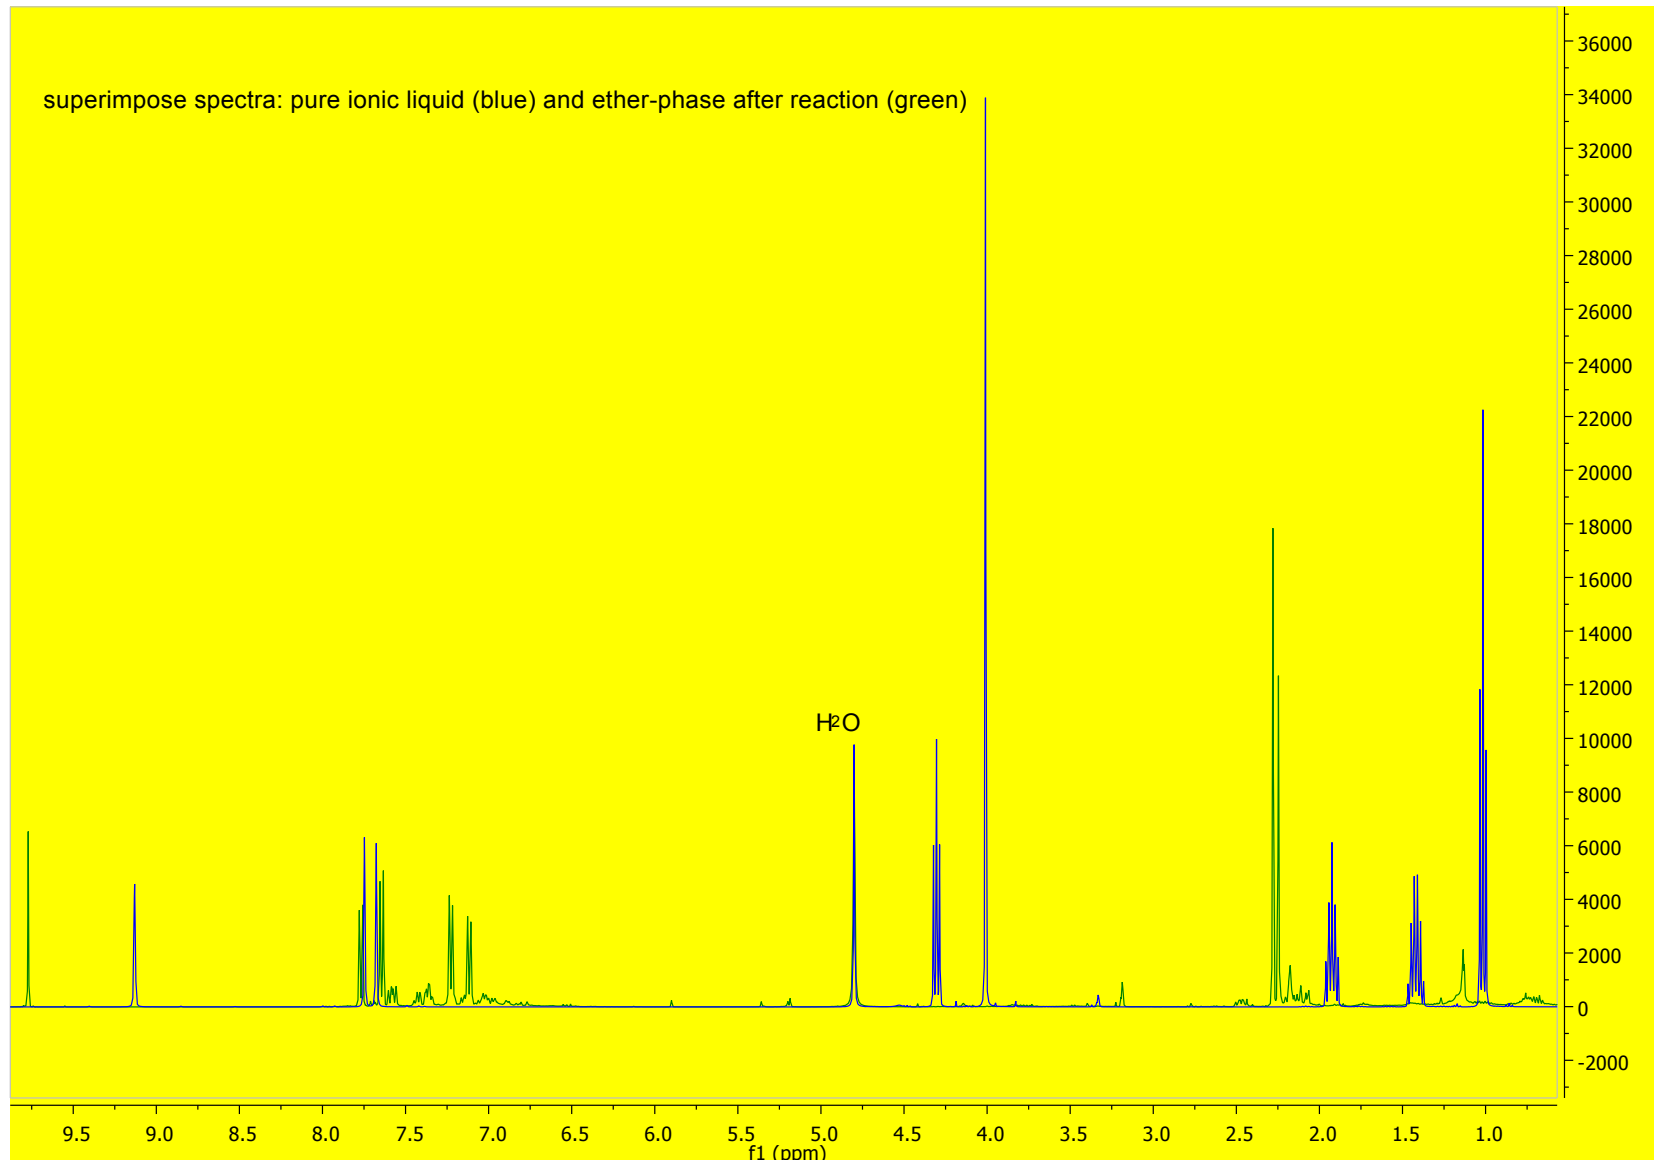

### **S3 Comparison of $^1\text{H}$ NMR spectra of the pure ionic liquid and extracted ether-phase after reaction**

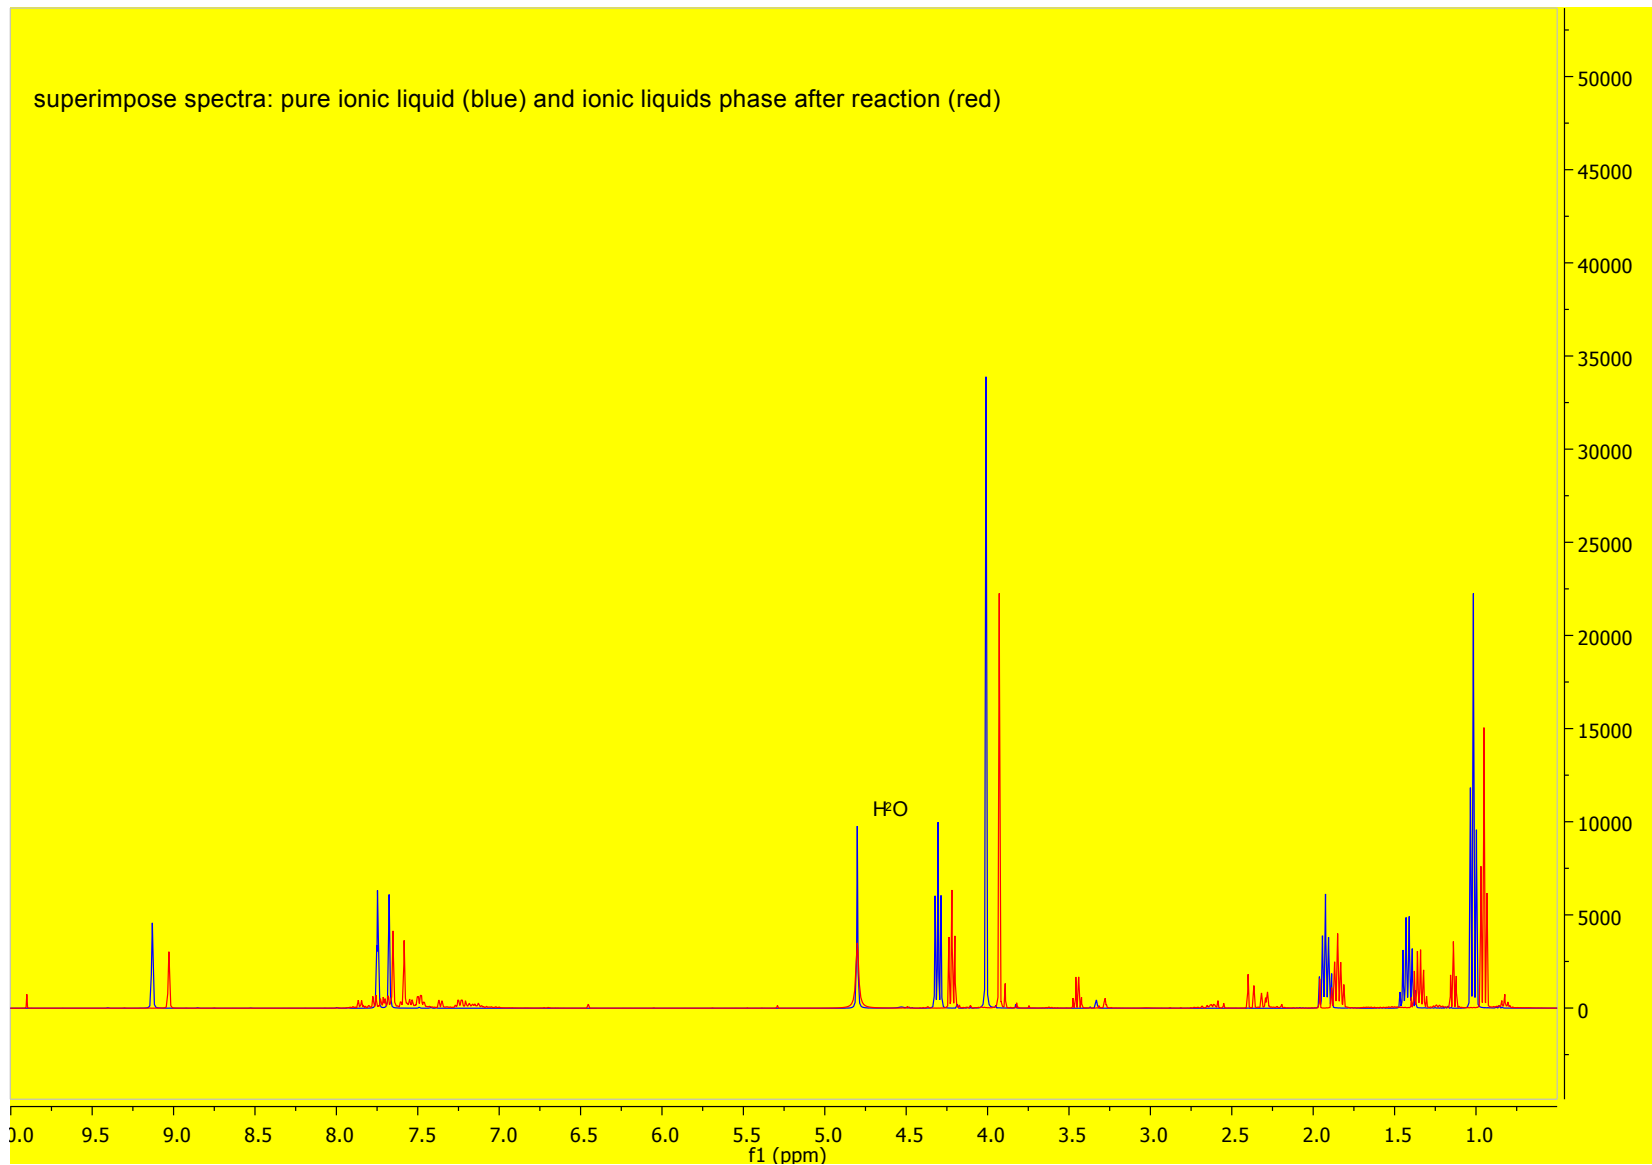

**S4** comparison of  $^1\text{H}$  NMR spectra of pure ionic liquid and extracted ionic liquid phase after reaction
